# Supplementary material for: Medical Student Research: An Integrated Mixed-Methods Systematic Review and Meta-Analysis
Source: PubMed Central journal article supplement (PMC4472353; doi:10.1371/journal.pone.0127470), 2015-06-18

**I.1.a. Interest in performing research (All) :**

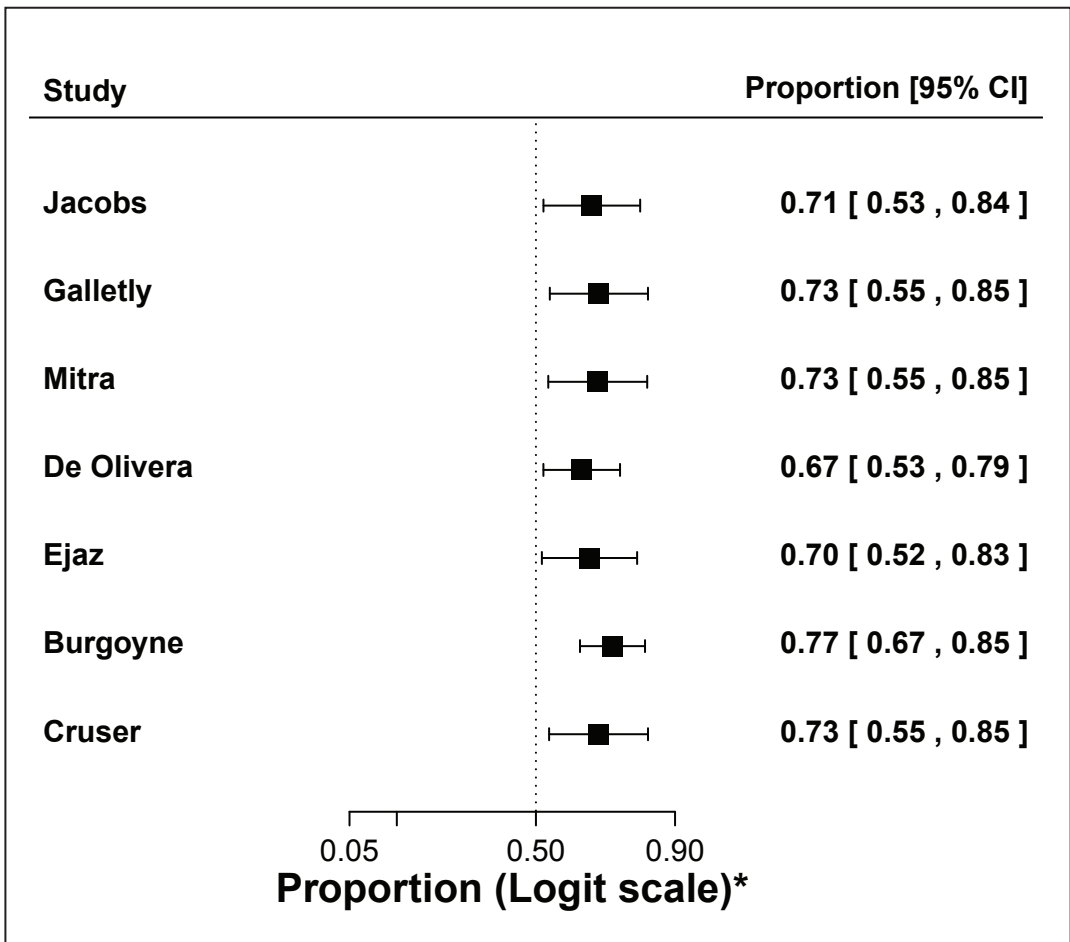

**I.1.b. Interest in a career involving research (All) :**

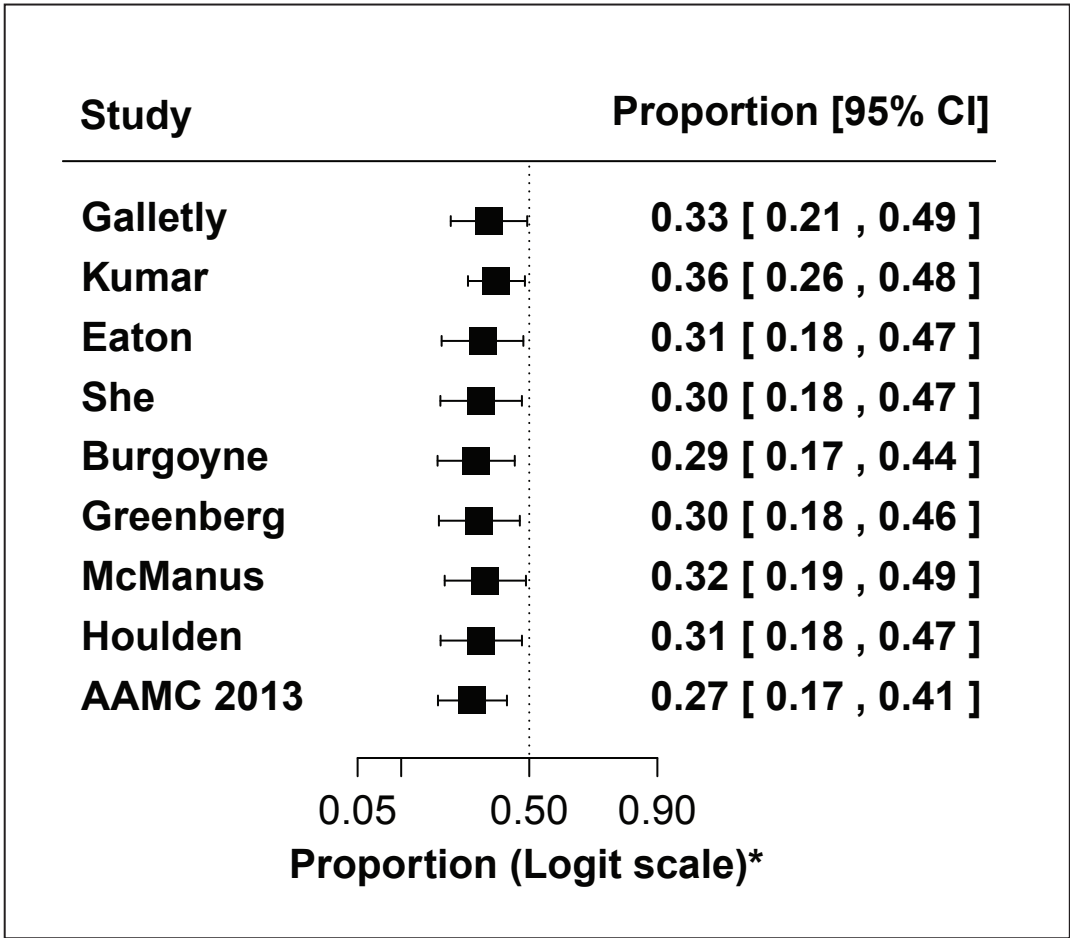

**I.2. Exposure of medical students to research (All) :**

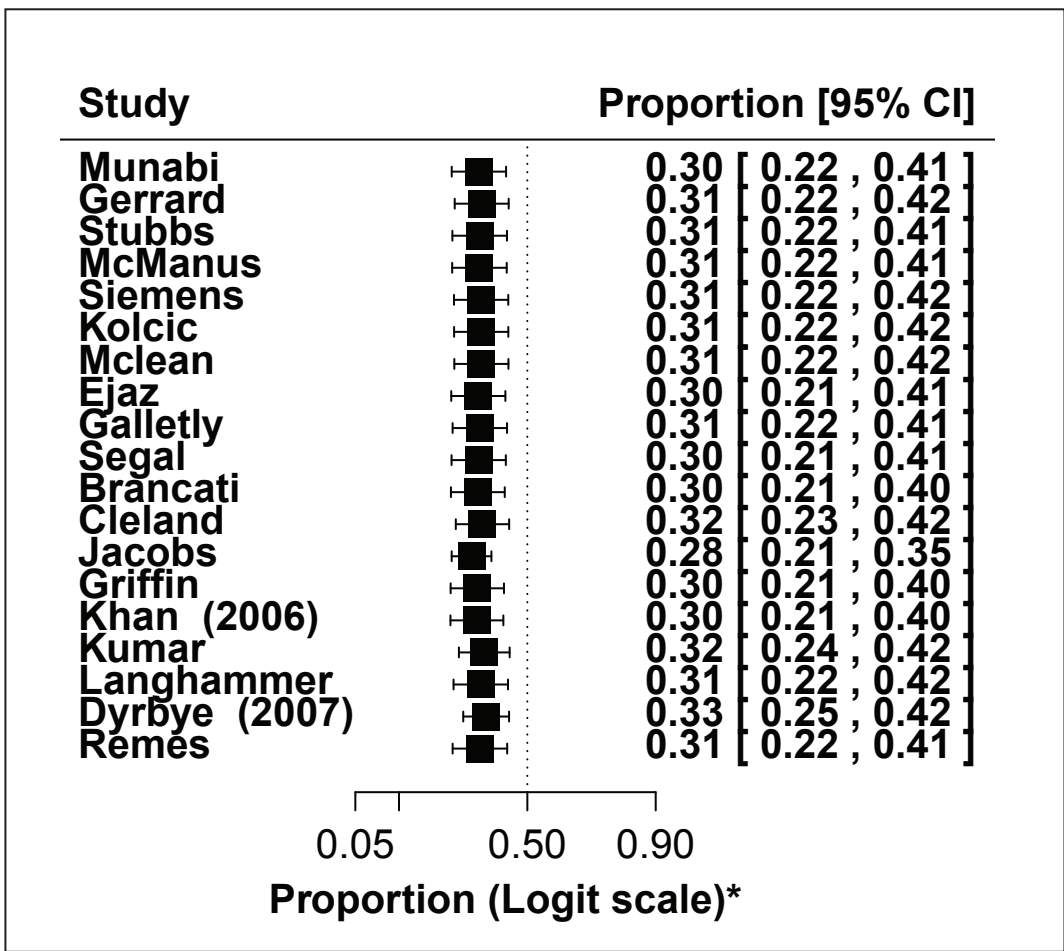

**II.1.a. Positive effect of research experience on interest in a research career :**

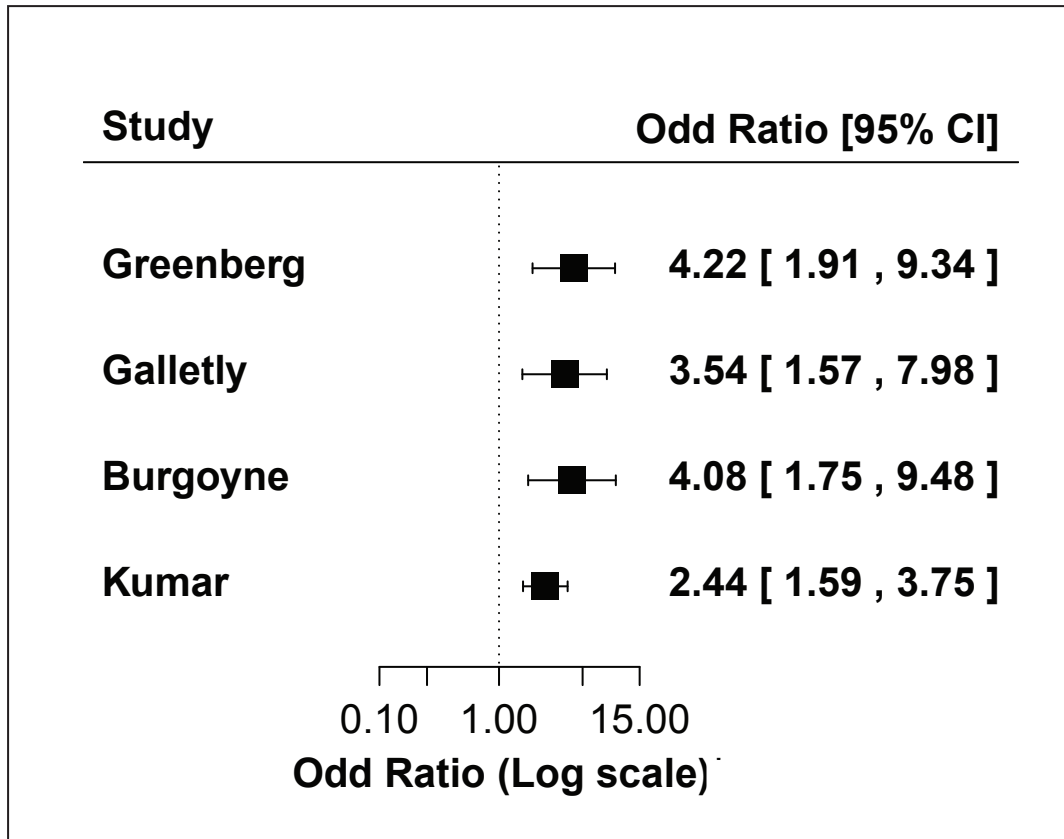

## II.1.b. Positive effect of research experience on research attitudes or motivation :

---

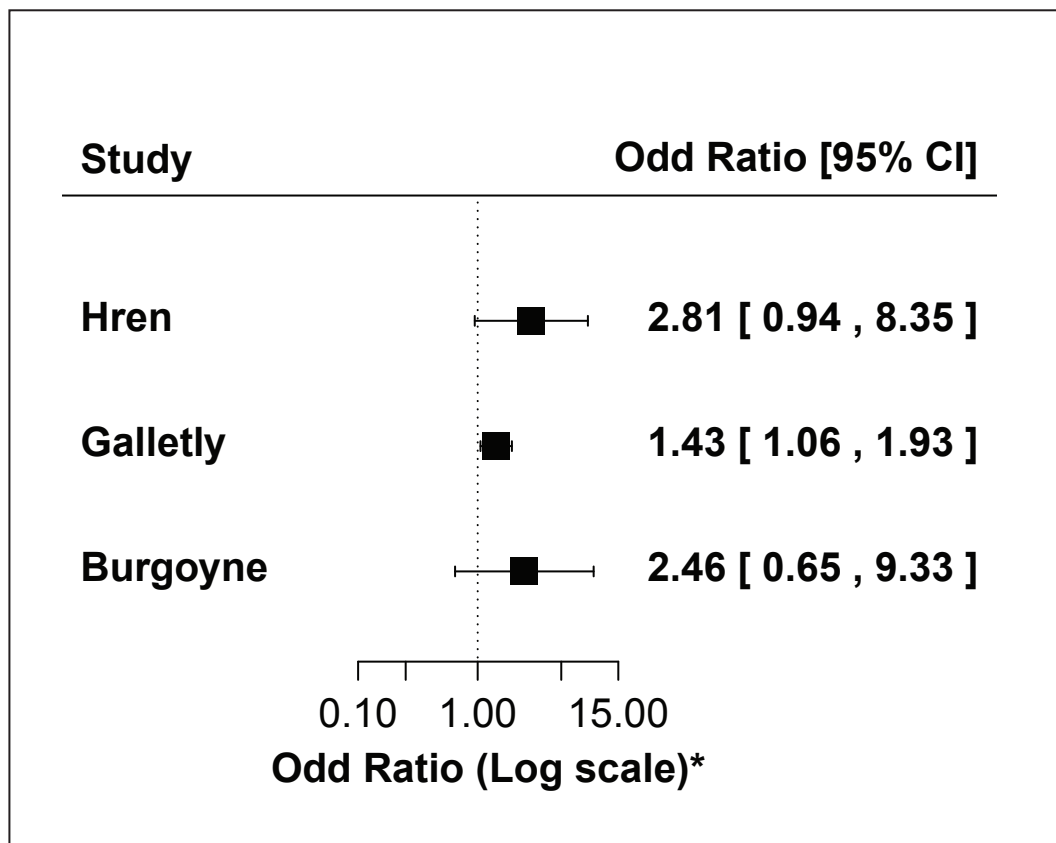

## II.2.b. Academic success is associated with research involvement :

---

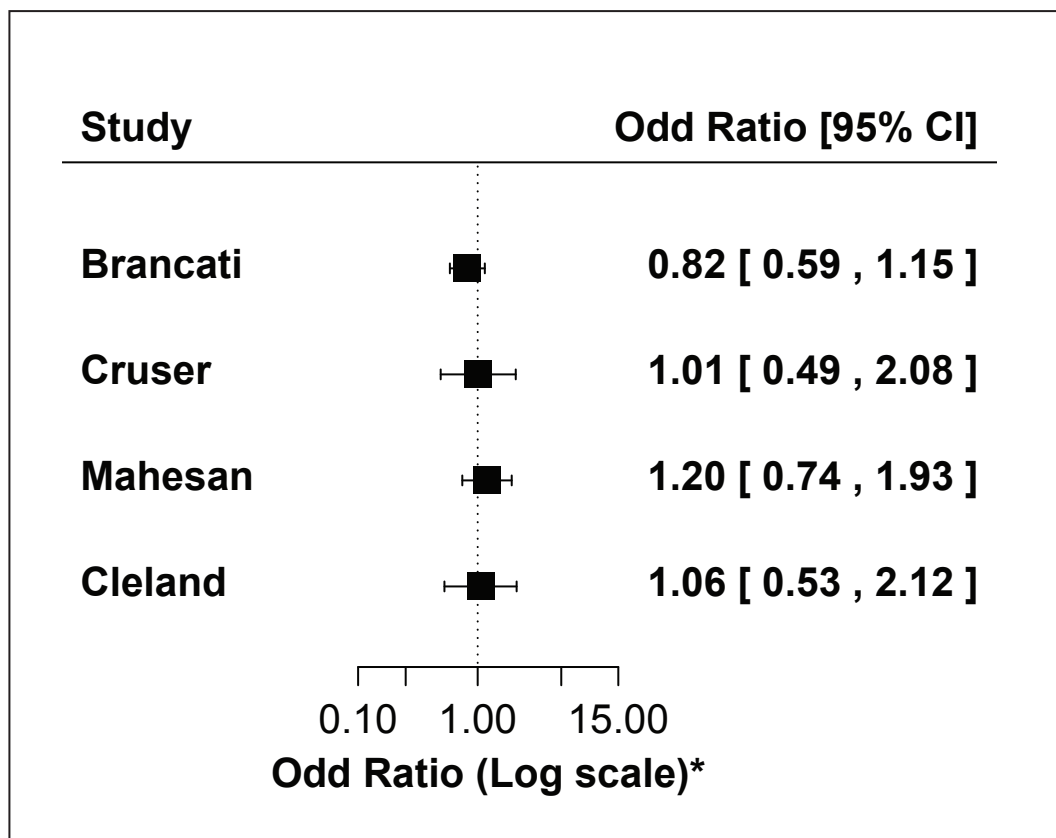

### III.1.a: Medical student research results in a publication (All) :

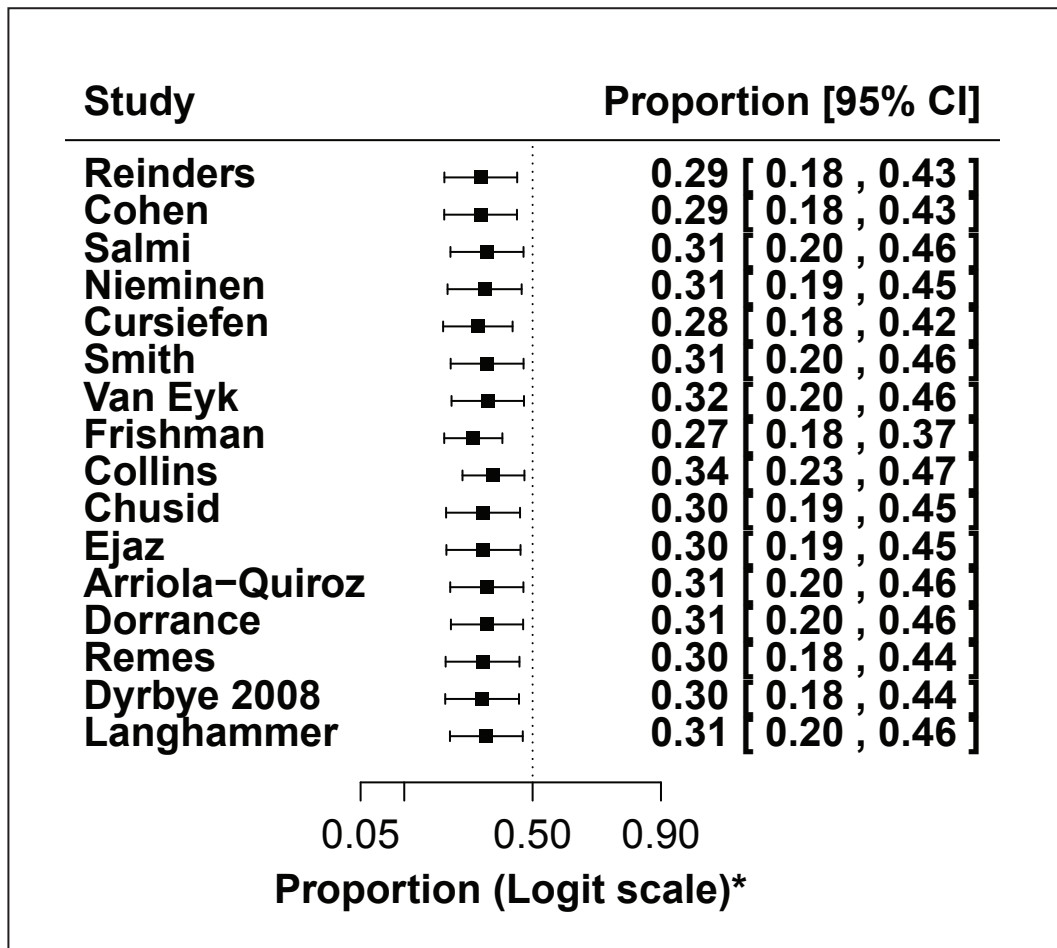

### III.1.a: Medical student research results in a high quality publication :

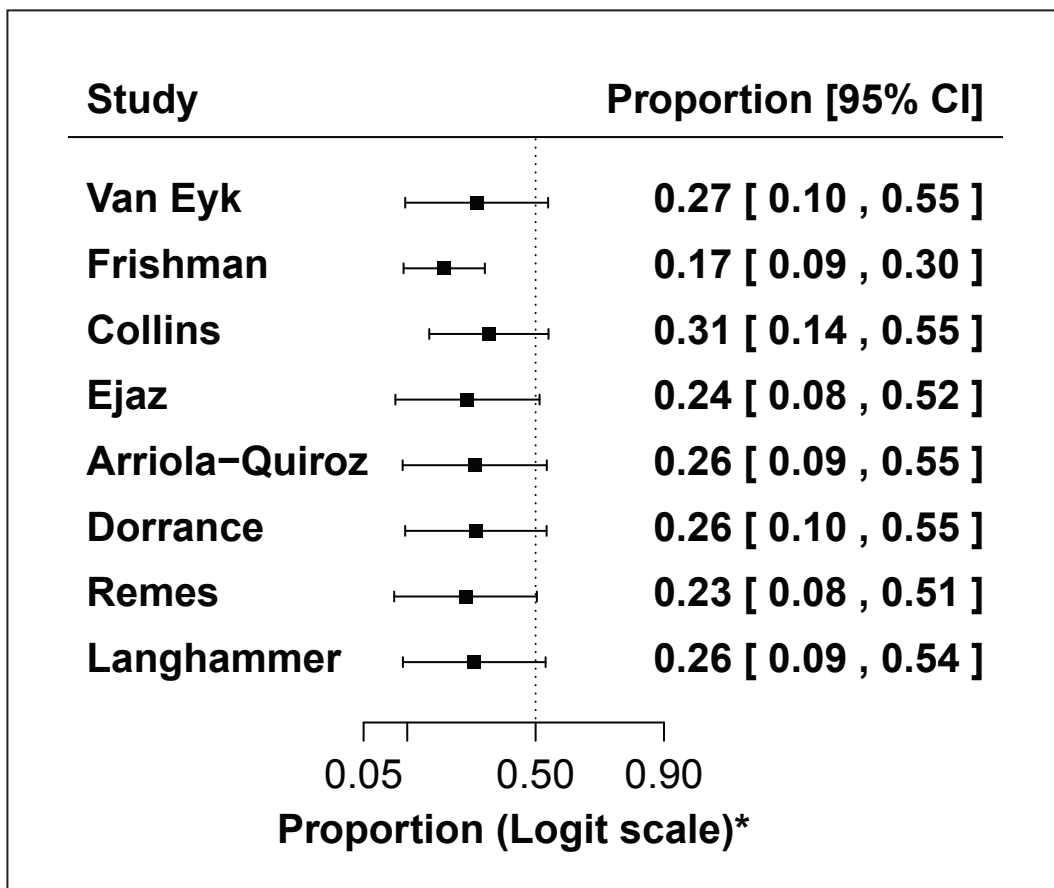

**III.1.b: Medical student research results in a first-authored publication (All) :**

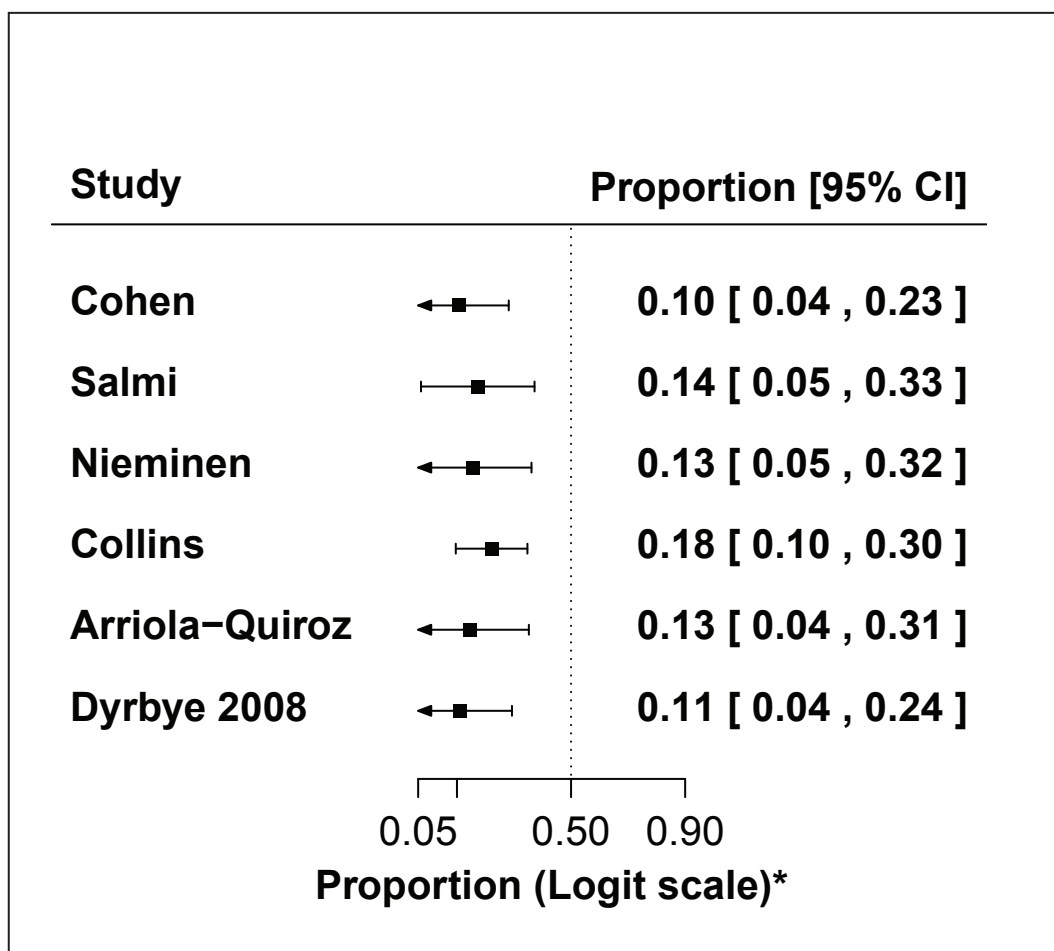

**III.1.b: Medical student research results in a first-authored high quality publication :**

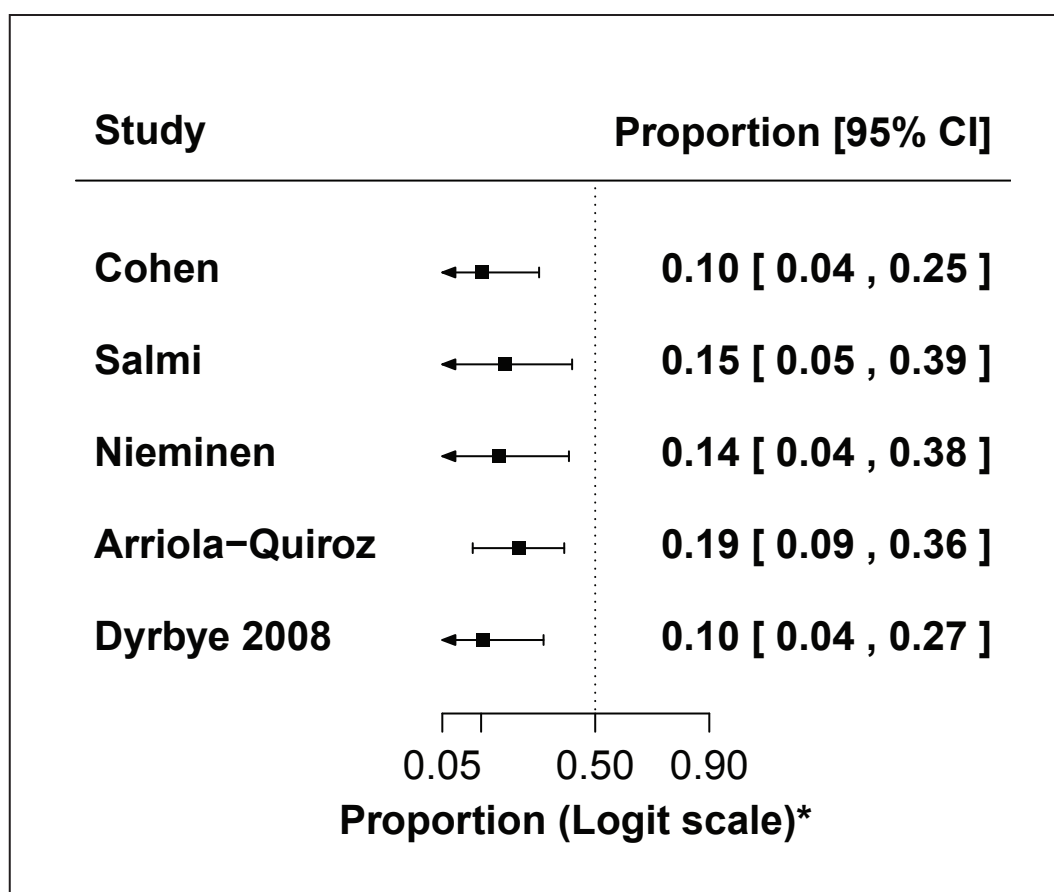

**III.2: Associated later involvement in research projects (all):**

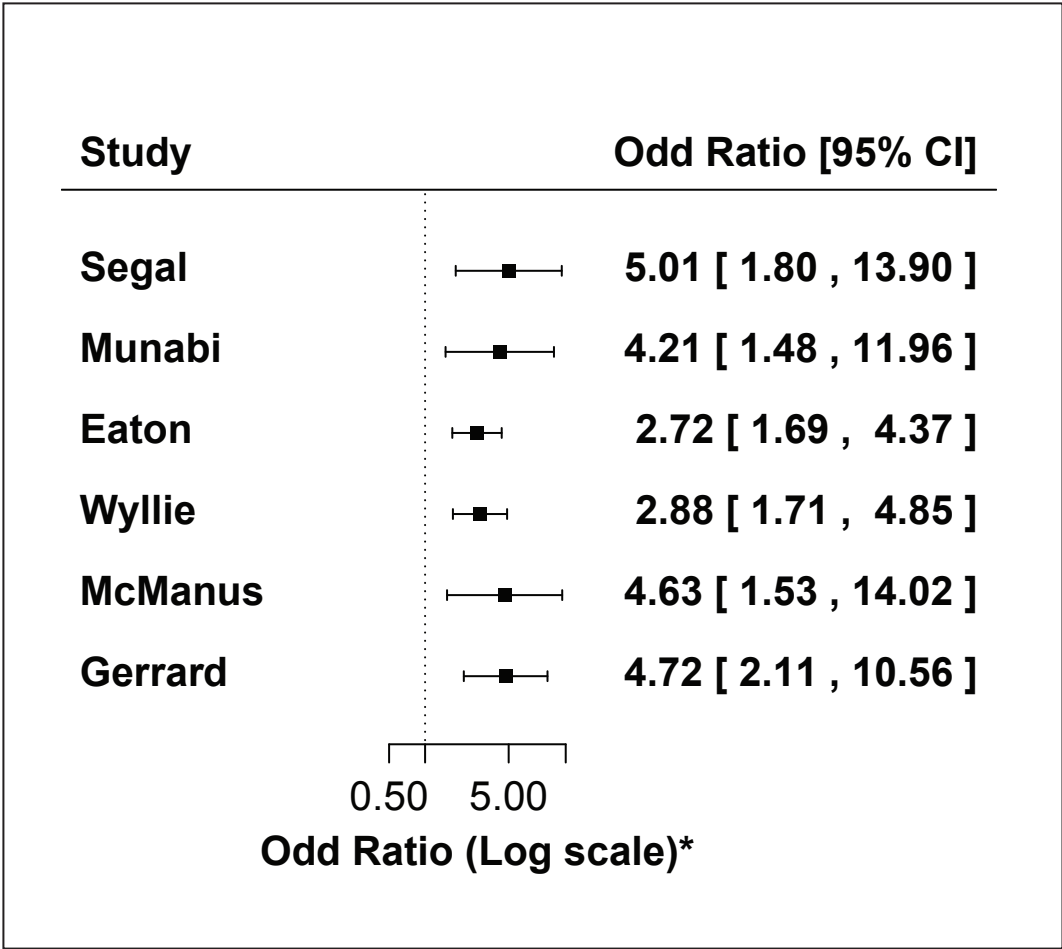

**III.2.a: Associated choice of an academic career :**

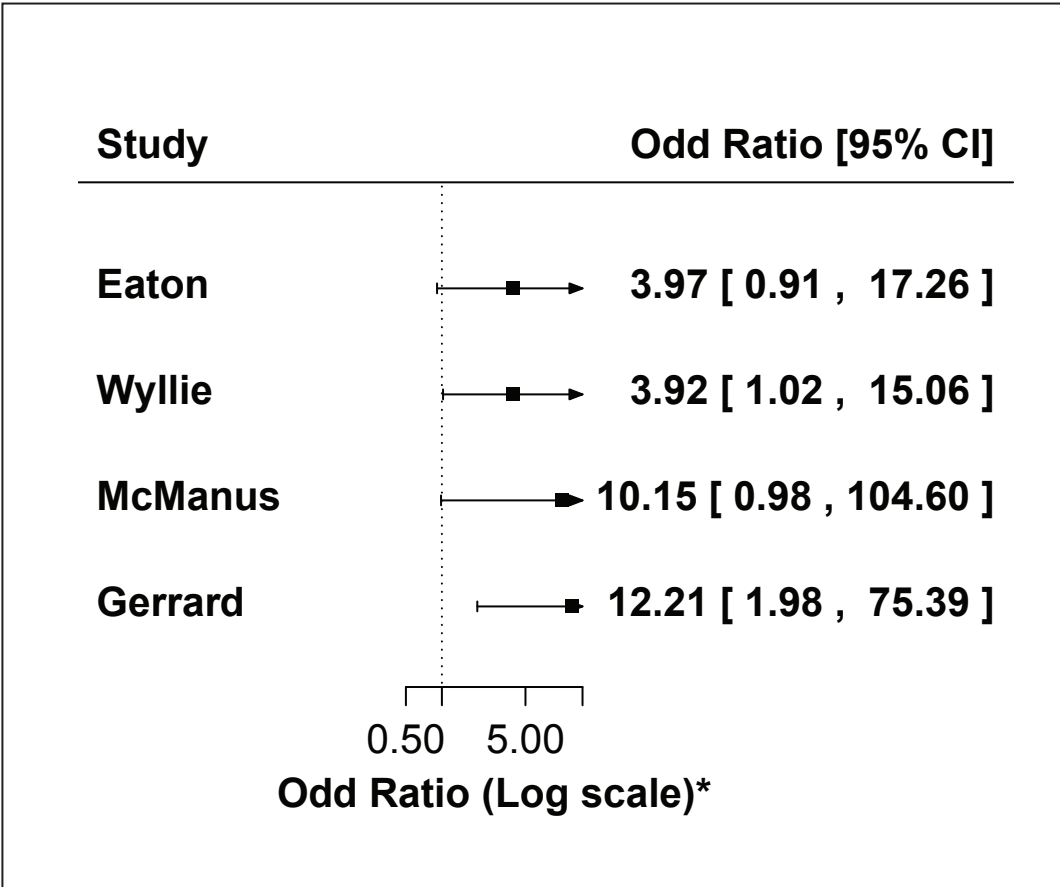

### III.3: Associated higher odds of having at least one publication (long-term):

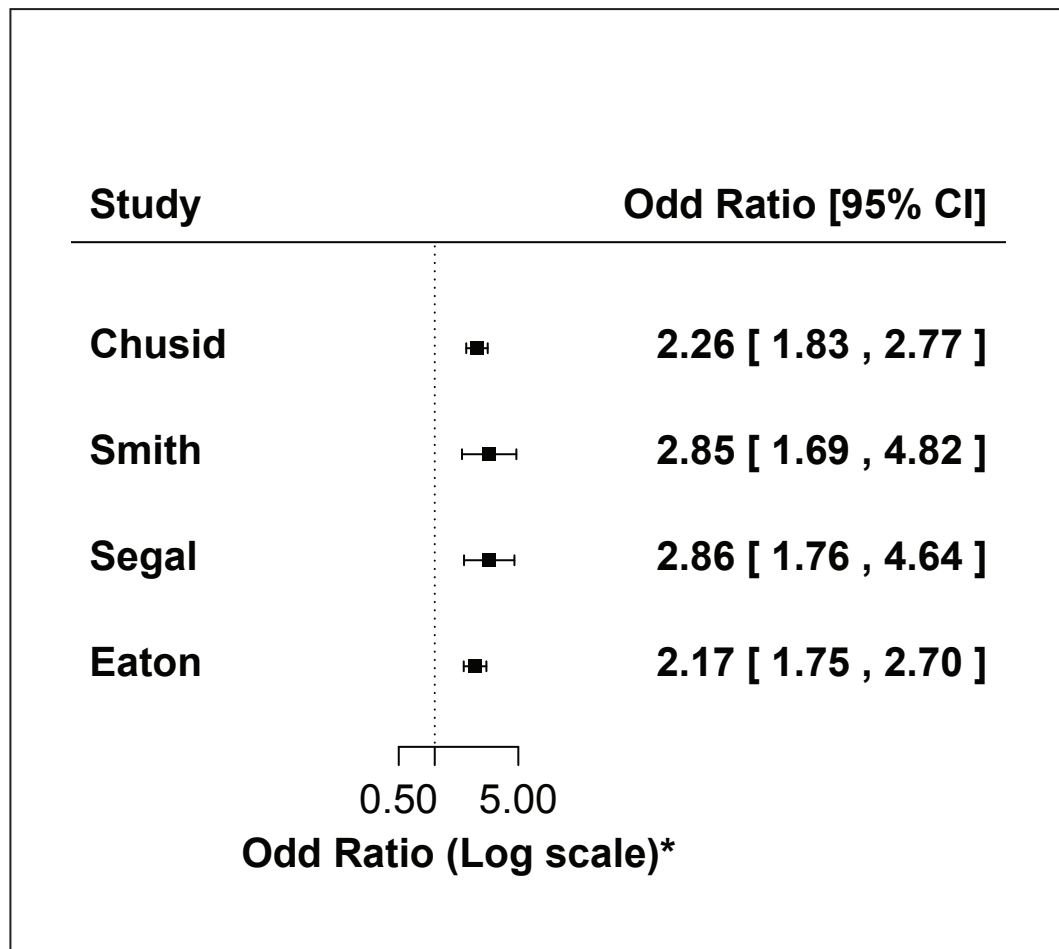

### III.4: Associated higher interest in a related specialty :

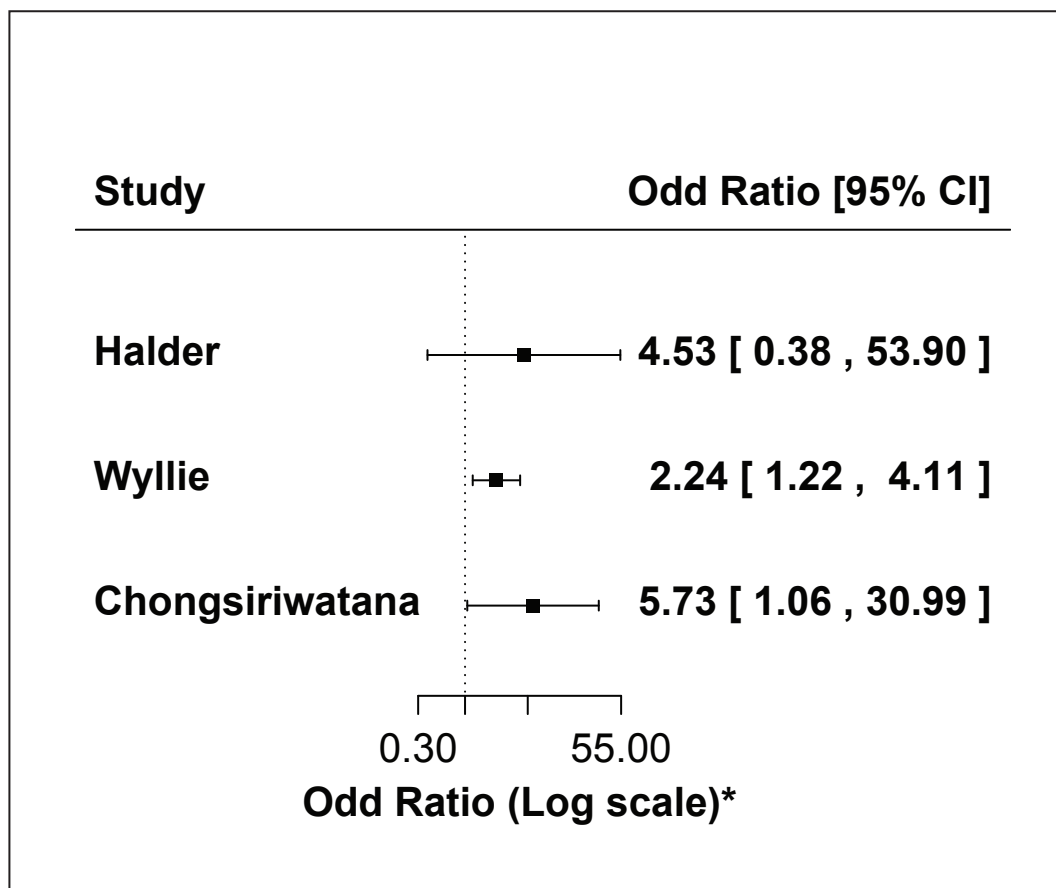

**IV.1: Effect of research time-off on academic performance (final year + controlled) :**

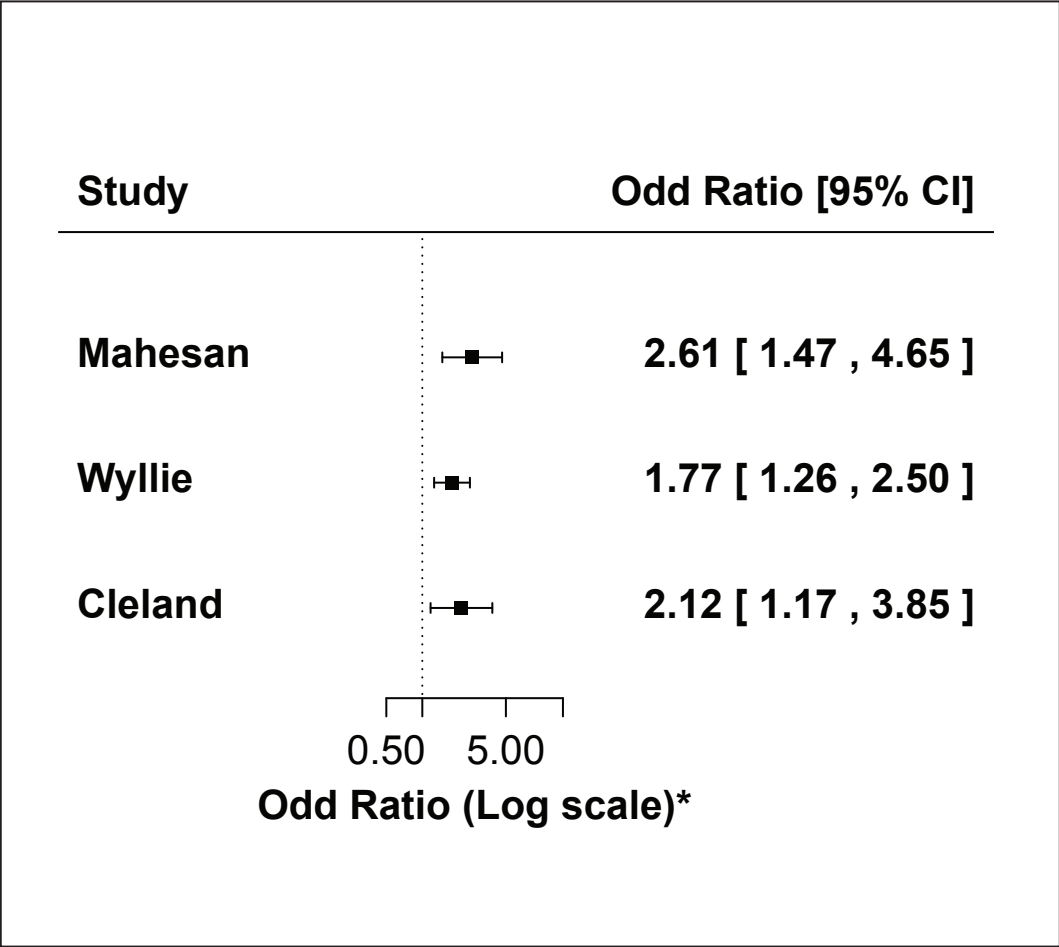

**IV.2.a.: Gender differences in publication of research (males are “treated” group) :**

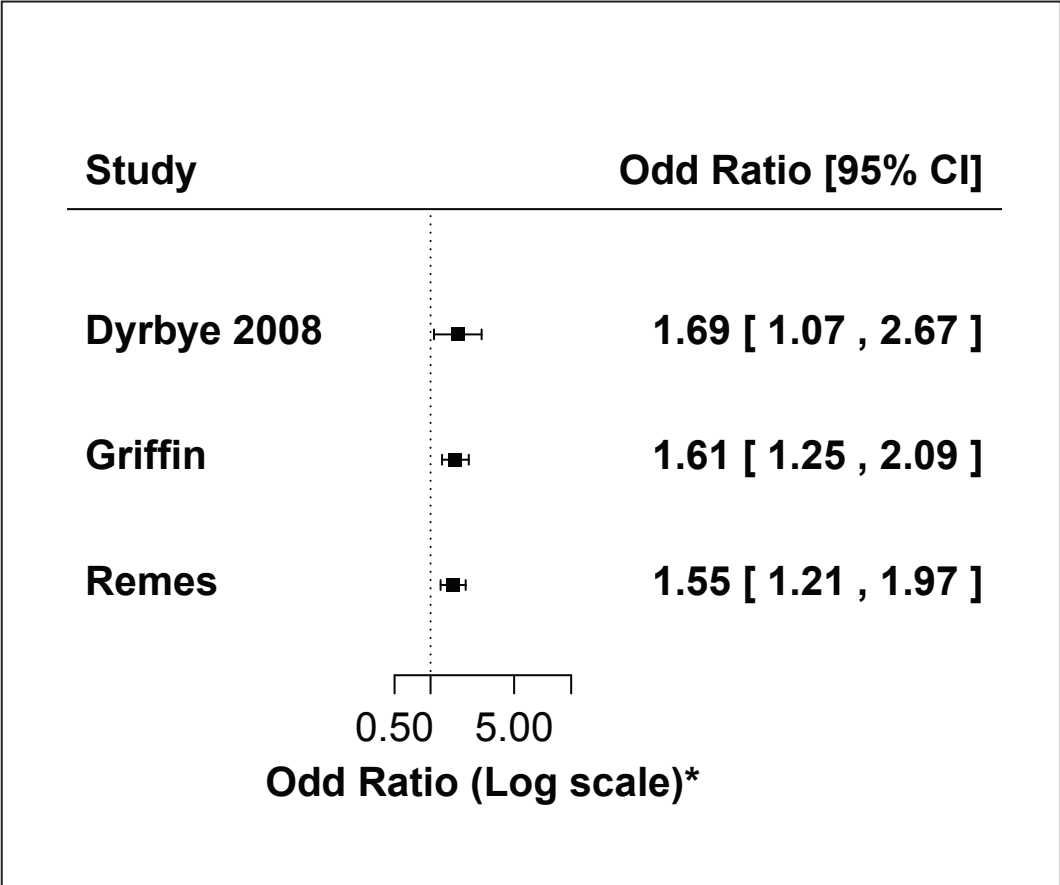



#### IV.2.b.: Gender differences in interest in a research career (males are “treated” group) :

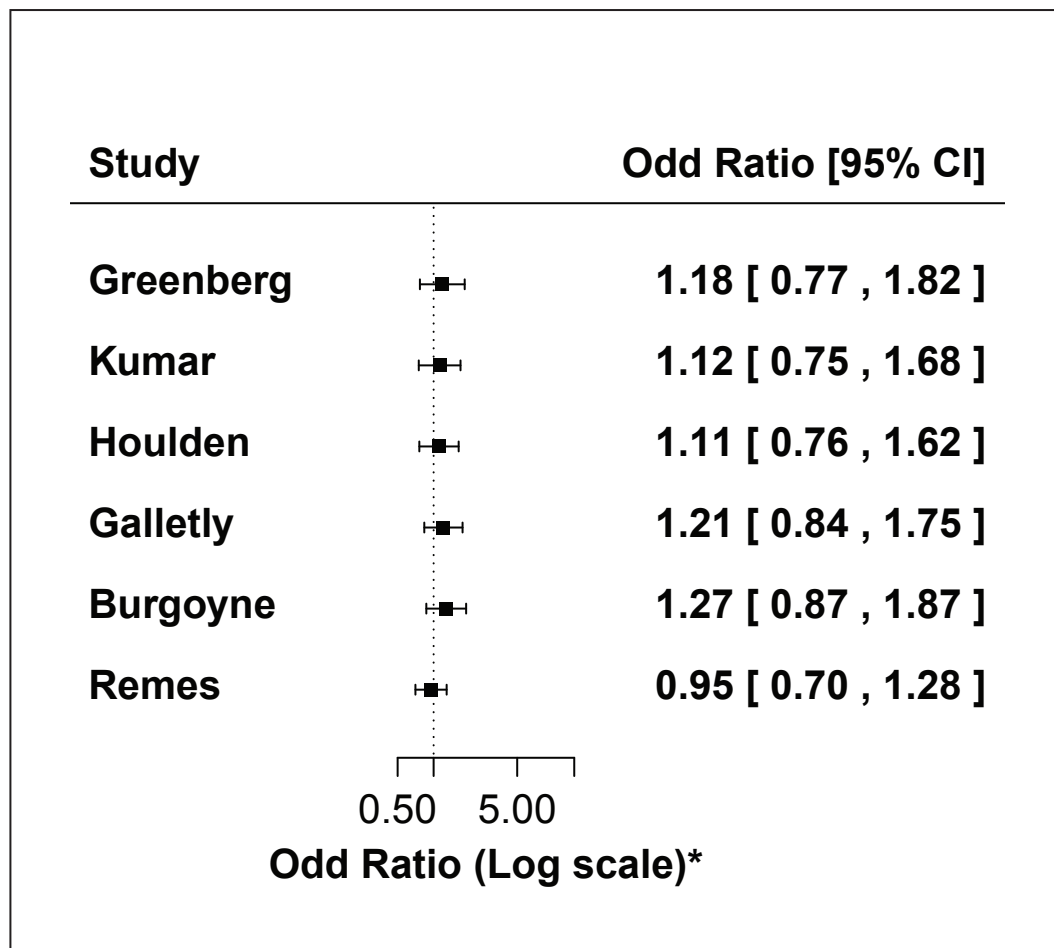

#### IV.2.c.: Gender differences in research involvement (males are “treated” group) :

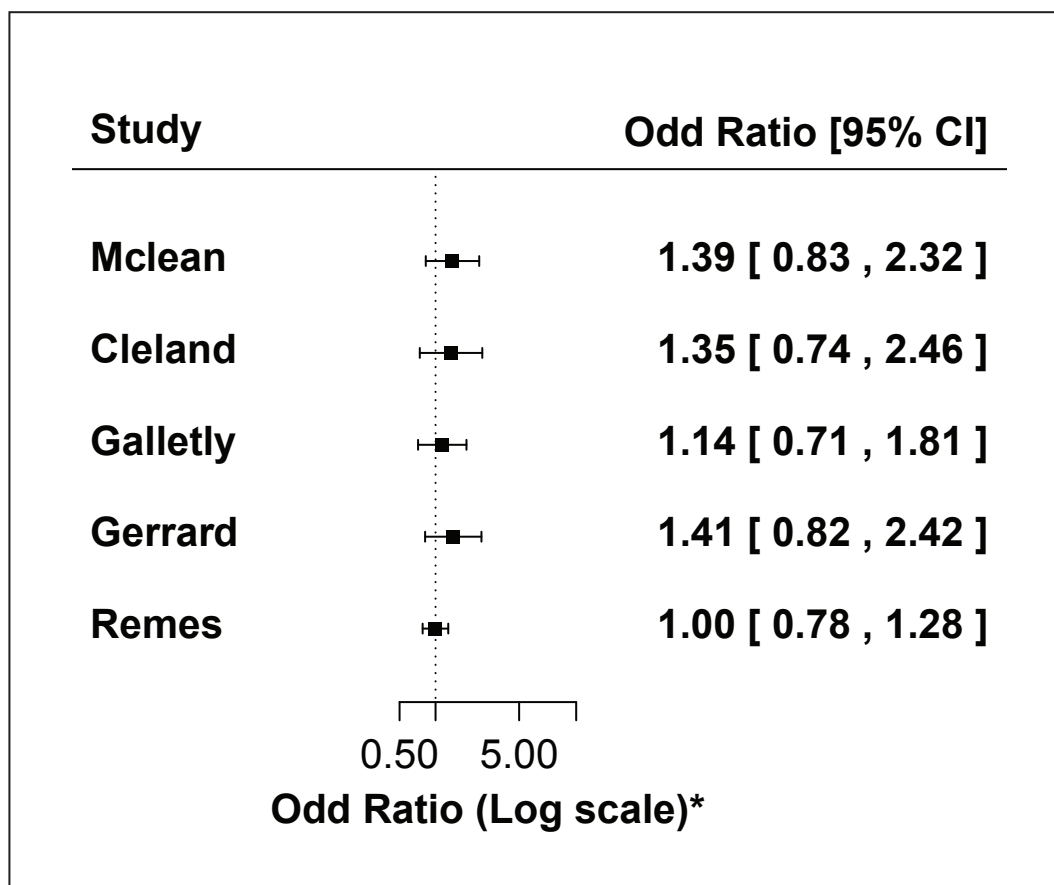

#### IV.2.d.: Gender differences in research attitudes (males are “treated” group) :

---

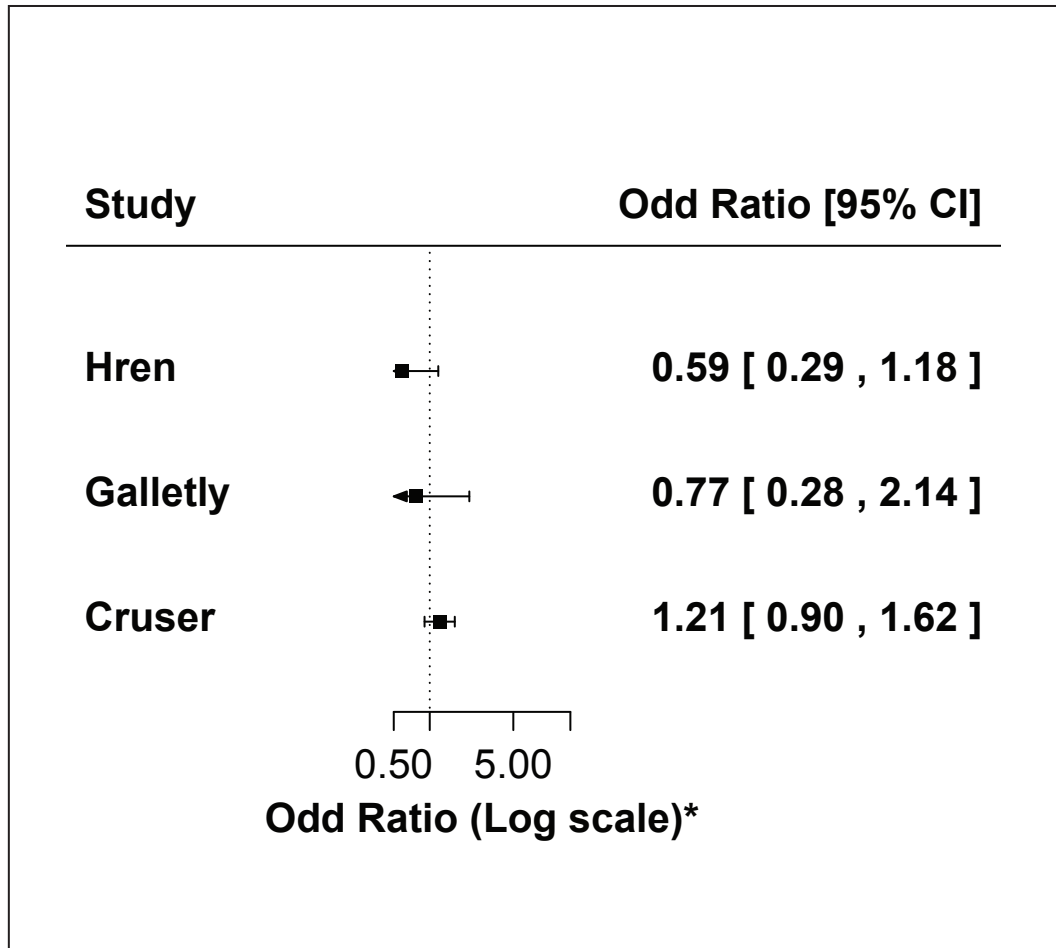

#### IV.2.e.: Gender differences in research interest (males are “treated” group) :

---

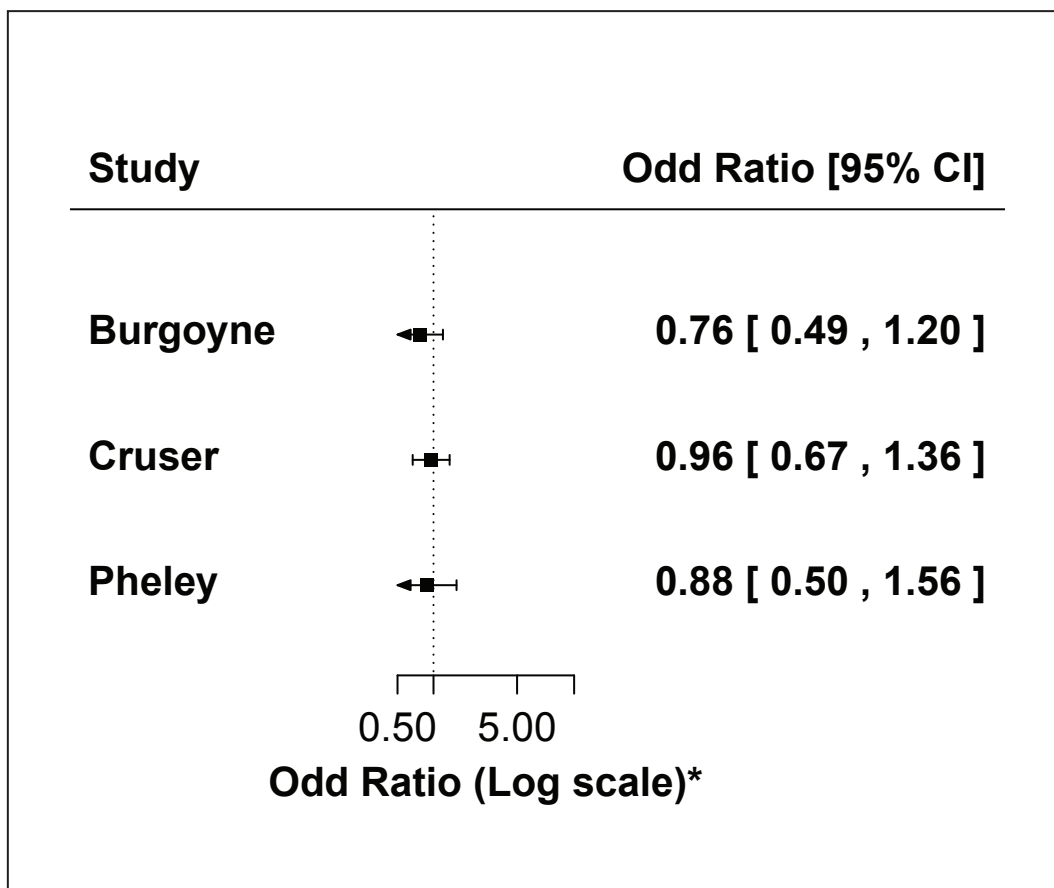

Supplement: pone.0127470.s004.pdf [file pone.0127470.s004.pdf]
