# Supplementary material for: Medical Student Research: An Integrated Mixed-Methods Systematic Review and Meta-Analysis
Source: PubMed Central journal article supplement (PMC4472353; doi:10.1371/journal.pone.0127470), 2015-06-18
Supplement: pone.0127470.s005.pdf [file pone.0127470.s005.pdf]

---

## **SUPPLEMENTARY TABLES**

### **Medical Student Research: An Integrated Mixed-Methods Systematic Review and Metaanalysis**

*Mohamed Amgad<sup>1 2</sup>, Marco Man Kin Tsui<sup>2</sup>, Sarah J. Liptrott<sup>3</sup> and Emad Shash<sup>4 5</sup>*

- 1. Faculty of Medicine, Cairo University, Cairo, Egypt*
  - 2. Okinawa Institute of Science and Technology Graduate University, Japan*
  - 3. European Institute of Oncology (IEO), Milano, Italy*
  - 4. National Cancer Institute, Cairo University, Egypt*
  - 5. European Organization For Research & Treatment of Cancer (EORTC) Headquarters, Brussels, Belgium*
-

| Study      | Type | Design | Institutions | N   | Population                                                                                      | Outcome measure                                                                               | Outcome     |
|------------|------|--------|--------------|-----|-------------------------------------------------------------------------------------------------|-----------------------------------------------------------------------------------------------|-------------|
| Burgoyne   | X    | Q      | S            | 317 | Medical students; University College Cork, Ireland                                              | Were unaware of research at their own university.                                             | 257 (81.1%) |
| Griffin    | X    | Q      | M            | 515 | Students; seven medical schools in UK.                                                          | Were not encouraged by superiors to perform research.                                         | 319 (61.9%) |
| Dewey      | X    | Q      | S            | 302 | Students; University Hospital Charite                                                           | Poor supervision                                                                              | 166 (55.0%) |
| De Olivera | X    | Q      | M            | 978 | Students; 13 medical schools (nine public schools and four private ones); Six Brazilian states. | Cited lack of institutional incentive as the main reason for lack of involvement in research. | 323 (33.0%) |
| Munabi     | X    | Q      | S            | 170 | Undergraduates; Makerere University School of Medicine.                                         | Lack of collaboration                                                                         | 118 (69.4%) |
|            |      |        |              | 161 |                                                                                                 | Lack of funding                                                                               | 98 (60.9%)  |
|            |      |        |              | 163 |                                                                                                 | Lack of guidance                                                                              | 80 (49.1%)  |
| Sanchez    | X    | Q      | M            | 601 | Students; Three national student conferences in the US                                          | No sufficient guidance to develop publishable research product                                | 152 (25.3%) |
| Galletly   | X    | Q      | S            | 155 | Final year students; University of Adelaide.                                                    | Lack of enough academic role models                                                           | 109 (70.3%) |
|            |      |        |              |     |                                                                                                 | Inadequate training                                                                           | 96 (61.9%)  |
| Yamazaki   | X    | Q      | S            | 33  | Students; Juntendo University School of Medicine, Japan                                         | Poor mentorship                                                                               | 1 (3.0%)    |
|            |      |        |              |     |                                                                                                 | Lack of academic role models                                                                  | 5 (15.2%)   |
|            |      |        |              |     |                                                                                                 | Lack of training                                                                              | 2 (6.1%)    |
|            |      |        |              |     |                                                                                                 | Lack of opportunities                                                                         | 9 (27.3%)   |
| Remes      | X    | Q      | S            | 91  | Students; University of Helsinki                                                                | Insufficient supervision or poor mentorship                                                   | 37 (40.7%)  |
| Siemens    | X    | Q      | M            | 327 | Second- and Fourth- year medical students; Three Canadian Medical Schools.                      | Inadequate training                                                                           | 35 (10.7%)  |
|            |      |        |              |     |                                                                                                 | Inadequate mentorship                                                                         | 141 (43.1%) |
|            |      |        |              |     |                                                                                                 | Lack of opportunities                                                                         | 64 (19.6%)  |

**Supplementary Table 1: Some of the drawbacks mentioned by medical students. Abbreviations used: X, Cross-sectional; Q, Questionnaire; S, Single; M, Multiple.**

| Study     | Type  | Design | Control group | Institutions | Other Limitations                                     | Overall quality | N   | Population                                                                                | Outcome measure                           | Outcome                                    |
|-----------|-------|--------|---------------|--------------|-------------------------------------------------------|-----------------|-----|-------------------------------------------------------------------------------------------|-------------------------------------------|--------------------------------------------|
| Jacobs    | R     | Q      | N             | S            |                                                       | Low             | 73  | Graduating class; Stanford University in 1991.                                            | Various skills                            | 73-94%                                     |
| Frishman  | R     | Q      | N             | S            |                                                       | Low             | 69  | Students; Albert Einstein College of Medicine                                             | Data collection skills                    | 63 (91%)                                   |
|           |       |        |               |              |                                                       |                 |     |                                                                                           | Literature search                         | 63 (91%)                                   |
|           |       |        |               |              |                                                       |                 |     |                                                                                           | Research techniques                       | 66 (95%)                                   |
| Zorzi     | R     | Q      | N             | S            | Methodology inadequately explained; Low response rate | Low             | 22  | Participants; Rural Summer Studentship Program; University of Western Ontario; 1999-2003. | Knowledge                                 | 3.4-6.0 (Likert scale, 7 is max)           |
| Zier      | R     | Q      | N             | S            | Compulsory questionnaire (risk of careless reporting) | Low             | 111 | Students who got funding for research; Mount Sinai Medical School *                       | Knowledge                                 | 100 (90%)                                  |
| Collins * | X     | Q      | N             | S            | Methodology inadequately explained                    | Low             | 130 | Medical students, University of Melbourne                                                 | Research skills                           | 4.0 (Likert scale, 5 is max)               |
|           |       |        |               |              |                                                       |                 |     |                                                                                           | Professional development                  | 3.9 (Likert scale, 5 is max)               |
|           |       |        |               |              |                                                       |                 |     |                                                                                           | Personal skills                           | 3.7 (Likert scale, 5 is max)               |
| Wagner    | R     | Q      | P             | S            | Very small sample size                                | Low             | 5   | Participants; Dermatology electives, University of Texas                                  | Research skills                           | 1.77-3.72 (Likert scale, 5 is max); P=0.05 |
| Riley     | I/Pro | Q      | N             | S            |                                                       | Medium          | 912 | Students; University of Edinburgh; Effect of Student Selected Components (SCC's)          | Knowledge                                 | 840 (92.1%)                                |
| Burgoyne  | R     | Q      | Y†            | S            |                                                       | High            | 316 | Medical students; University College Cork, Ireland **                                     | General skills Vs. exposure to research   | OR=1.23 (0.61-2.46)                        |
|           |       |        |               |              |                                                       |                 |     |                                                                                           | Research skills Vs. exposure to research  | OR=0.9(0.51-1.58) ‡                        |
| 314       |       |        |               |              |                                                       |                 |     |                                                                                           |                                           |                                            |
| Stubbs *  | R     | Q      | N             | M            | Low response rate                                     | Low             | 253 | Students who chose to intercalate; Bristol and Sheffield Medical Schools, UK              | Gain of skills useful for future career   | 230 (90.9%)                                |
| Eaton *   | R     | Q      | N             | S            |                                                       | Low             | 90  | BMedSci (iBSc) graduates; University of Queensland, Australia                             | Gain of understanding of research methods | 71 (78.9%)                                 |
| Galletly  | R     | Q      | N             | S            |                                                       | Low             | 155 | Final year students; University of Adelaide.                                              | Knowledge                                 | 116 (75%)                                  |

**Supplementary Table 2: Positive effect of research experience on medical students' knowledge or skills.** \* Studies describing the effect of an intercalated Bachelor of Science (iBSc); \*\* Research experience not necessarily during medical school (not specified) ;† Data obtained directly from authors and dichotomized (results are adjusted for age, sex and having a previous degree prior to matriculation); ‡ Results are not significant (we could not find any correlation). *Abbreviations used:* **X**, Cross-sectional; **R**, Retrospective; **I/Pro**, Interventional/Prospective; **Q**, Questionnaire; **Y**, Yes; **N**, No; **P**, Paired outcomes; **S**, Single; **M**, Multiple.

| Study           | Type | Design | Control group | Inst. | Other limitations                                                                                                            | Overall quality | N    | Population                                              | Outcome measure                                                                                                       | Outcome                      |
|-----------------|------|--------|---------------|-------|------------------------------------------------------------------------------------------------------------------------------|-----------------|------|---------------------------------------------------------|-----------------------------------------------------------------------------------------------------------------------|------------------------------|
| <b>Kim</b>      | X    | Q      | Y             | M     |                                                                                                                              | Medium          | 1388 | Students; Six Korean Medical schools                    | <i>Less</i> interest in clinical medicine among students planning non-clinical careers.                               | P<0.01                       |
| <b>Sanchez</b>  | R    | Q      | Y             | M     | Low response rate; Base population is attendees of medical student conferences (interested in research almost by definition) | Medium          | 601  | Students; Three national student conferences in the US  | Students interested in primary care specialties significantly <i>less</i> interested in academic medicine career.     | OR=0.46(0.32-0.64); P<0.0001 |
| <b>Lloyd</b>    | X/R  | Q      | Y             | S     | Low response rate; Base population is medical graduates (not students).                                                      | Low             | 433  | Graduates; Penn State College of Medicine; 1985-95      | Full time clinical practice <i>not</i> associated with an academic health center Vs. Involvement in clinical research | OR=0.13(0.08-0.20); P<0.0001 |
| <b>Yamazaki</b> | X    | Q      | N             | S     | Low response rate                                                                                                            | Low             | 33   | Students; Juntendo University School of Medicine, Japan | Desire to be clinicians cited as an obstacle to entering basic science                                                | 22 (66.7%)                   |

**Supplementary Table 3: Disparity between interest in clinical practice and interest in a research career. Abbreviations used: X, Cross-sectional; R, Retrospective; Q, Questionnaire; Y, Yes; N, No; Inst., Number of institutions; S, Single; M, Multiple.**

| Study             | Type | Design | Control group | Control for confounding | Institutions | Lim. | Overall quality | N   | Population                                              | Outcome measure                                                                                        | Outcome            |
|-------------------|------|--------|---------------|-------------------------|--------------|------|-----------------|-----|---------------------------------------------------------|--------------------------------------------------------------------------------------------------------|--------------------|
| <b>Galletly</b>   | X    | Q      | Y             | Y *                     | S            |      | Medium          | 105 | Final year students; University of Adelaide.            | Students interested in formal teaching have higher interest in performing research during their career | OR=3.62(1.41-9.33) |
| <b>Yamazaki**</b> | X    | Q      | Y             | N                       | S            | Rp.  | Medium          | 269 | Students; Juntendo University School of Medicine, Japan | Interest in basic sciences                                                                             | OR=16.1(7.83-33.3) |
| <b>Kim</b>        | X    | Q      | N             | N                       | M            |      | Low             | 42  | Students; Six Korean Medical schools                    | Interest in research among those interested in basic sciences                                          | 13 (31%)           |

**Supplementary Table 4 : Interest in academia (basic medical sciences or formal teaching) is related to interest in research.** \* Adjusted for age, sex and research involvement (data obtained directly from authors and dichotomized). \*\* Data regrouped from original table presented. *Abbreviations used:* **X**, Cross-sectional; **Q**, Questionnaire; **Y**, Yes; **N**, No; **S**, Single; **M**, Multiple; **Lim**, Other limitations; **Rp**, low response rate (<60%).
